# Supplementary material for: Predation on scyphozoan polyps and selective nematocyst incorporation dynamics in an alien aeolid nudibranch
Source: Research Square preprint supplement (doi:10.21203/rs.3.rs-6803093/v1), 2025-06-18
Supplement: Supplementary file 1 [file aba0ad6582249448c2dbb4b6.xlsx]

## Sheet: S1
	Day
Nudibranch-food	0 Nat	3	6	9	12
CM102-Cas	+	+		+
CM103-Cas	+	+			+
CM104-Cas	+		+		+
CM105-Cas	+		+
CM106-Cas	+	+		+
CM107-Au	+	+		+
CM108-Au	+	+			+
CM109-Au	+		+		+
CM110-Au	+		+
CM111-Au	+			+
CM112-Ap					+
CM113-Ap					+
CM102-Nom					+
CM103-Nom					+
CM107-Nom					+
CM108-Nom					+
CM113-Nom					+
CM114-Nom					+
CM113-Pd		+	+	+	+
CM114-Pd		+	+	+	+

## Sheet: S2
Nudibranch	Prey	Predation rate (polyps d-1)
CM102	C. andromeda	10.80 ± 10.84
CM103	C. andromeda	6.22 ± 4.31
CM104	C. andromeda	5.58 ± 6.71
CM105	C. andromeda	1.81 ± 3.79
CM106	C. andromeda	9.38 ± 12.34
CM107	Aurelia sp.	6.50 ± 6.80
CM108	Aurelia sp.	13.54 ± 16.66
CM109	Aurelia sp.	10.14 ± 9.84
CM110	Aurelia sp.	4.48 ± 5.79
CM111	Aurelia sp.	5.41 ± 6.89
CM102	R. nomadica	3.93 ± 1.15
CM103	R. nomadica	2.37 ± 0.55
CM107	R. nomadica	3.27 ± 1.34
CM108	R. nomadica	4.27 ± 1.60
CM113	R. nomadica	3.39 ± 0.57
CM114	R. nomadica	3.83 ± 1.47

## Sheet: S3
Amount polyps provided	Nudibranch	Mean predation rate (polyps d-1)	SD predation rate	Mean polyps provided d-1	SD polyps provided	Predation proportion
Low	CM26	9.68	2.46	36.89	20.04	0.96
Low	CM50	12.11	4.93	69.92	20.48	0.92
Low	CM51	9.35	5.79	76.36	27.21	0.64
Low	CM58	12.88	4.07	66.5	4.95	1
Low	CM60	13.52	2.8	56	22.7	0.9
Low	CM61 *	16.67		100		1
Low	CM63 *	13.33		80		1
Low	CM65	5.84	4.74	31.54	35.6	0.84
Low	CM66	4.98	4.47	25.64	18.18	0.67
Low	CM67	3.74	3.13	31.38	15.18	0.43
Low	CM68	4.46	5.05	37.82	37.19	0.58
Low	CM69	5.51	3.39	35.89	29.68	0.55
Low	CM70	4.62	3.31	21.67	14.36	0.78
Low	CM71	5.29	3.97	29	13.86	0.62
Low	CM72	3.98	3.11	25.44	18.55	0.56
Low	CM74	6.02	3.86	30	16.73	0.73
Low	CM76	2.5	2.01	11.21	8.17	0.78
Low	CM77	4.3	3.91	18.27	14.58	0.89
Low	CM81	4.03	4.87	21.67	18.48	0.68
Low	CM82	2.48	2.72	14.5	9.75	0.66
Low	CM83	1.27	1.78	6.6	6.27	0.67
Low	CM84	1.73	1.72	6.6	4.39	0.94
Low	CM102	3.88	3.53	29.38	17.13	0.46
Low	CM103	4.34	3.21	29	12.73	0.44
Low	CM105 *	0.6		81		0.04
Low	CM107	5.72	5.59	19.2	11.39	0.81
Low	CM109 *	8		26		0.62
Low	CM110	9	6.26	34.67	1.53	0.52
Low	CM111	9.5	11.31	37	2.83	0.51
Low	CM113	3.4	0.57	15.5	3	0.77
Low	CM114	3.83	1.47	16	5.1	0.86
Medium	CM26	31.31	12.79	93.56	39.15	0.89
Medium	CM50	29.64	10.36	144.31	53.12	0.84
Medium	CM51	16.77	9.32	141.54	59.98	0.5
Medium	CM58	32.27	9.12	126.56	37.99	0.91
Medium	CM60	35.18	8.06	128.71	28.8	0.96
Medium	CM61	48.45	1.34	325	106.07	0.96
Medium	CM62	30.18	17.61	222	104.26	0.84
Medium	CM63	26.63	3.71	160	56.57	0.74
Medium	CM64	35.29	4.33	252.5	20.62	0.84
Medium	CM65	25.02	12.29	162	110.31	0.88
Medium	CM66	26.21	8.79	195	49.5	0.94
Medium	CM67	21.43		210		0.71
Medium	CM68 *	25.98	11.75	164.5	120.92	0.89
Medium	CM69	17.08	7.58	126.2	74.59	0.74
Medium	CM70 *	35.29		250		0.99
Medium	CM71	16.29	13.74	195	7.07	0.58
Medium	CM72	21.92	12.98	166.75	95.02	0.78
Medium	CM74	24.86	6.67	195	35.36	0.89
Medium	CM102	13.88	14.1	48.75	13.12	0.41
Medium	CM103	6.9	5.37	39	12.59	0.21
Medium	CM105	0.39	0.8	76	2.83	0.02
Medium	CM106	6.31	7.74	99.14	47.65	0.16
Medium	CM107	3.17	4.8	76.83	37.09	0.08
Medium	CM109	13.42	9.22	81.5	70.33	0.28
Medium	CM110	10.5	3.54	27.5	0.71	0.38
Medium	CM111	3.5	4.94	76.29	35.56	0.06
High	CM26	67.71	9.12	138.5	63.48	0.98
High	CM50	63.07	8.44	301.13	55.01	0.93
High	CM51	22.96	11.36	280	90.11	0.38
High	CM58	58.94	8.22	196.67	63.77	0.95
High	CM60	60.58	12.64	258.5	55.29	0.95
High	CM61	62	8.49	365	21.21	0.85
High	CM63 *	63.6		320		0.99
High	CM64 *	60		380		0.79
High	CM102	11	5.66	60.5	6.36	0.18
High	CM105	1.33	0.58	79	1	0.02
High	CM106	11	15.56	92	31.11	0.24
High	CM107	5.5	6.36	109	67.88	0.06
High	CM109	0	0	177.5	12.02	0
High	CM111 *	0		80		0
Very high	CM26	83.17	11.08	172	101.82	0.92
Very high	CM50	78.75	36.18	398.33	156.77	0.78
Very high	CM51	52.5	15.32	495	35.36	0.44
Very high	CM58 *	105		210		1
Very high	CM60	89.83	16.66	190	20	0.95
Very high	CM63	95.2	13.86	440	14.14	0.96
Very high	CM102 *	26		83		0.31
Very high	CM105 *	13		86		0.15
Very high	CM106	18.5	26.16	150.5	28.99	0.12
Very high	CM107	13	8.49	124	15.56	0.1
Very high	CM109	11.5	16.26	147	2.83	0.08
Very high	CM111 *	16		107		0.15

## Sheet: S4
Nudibranch	Polyp species	Number of feeding events	Mean predation rate (polyps d-1)	SD predation rate	Maximum polyps consumed d-1	Survival (d)	Proportion consumed
CM26	R. nomadica	24	33.59	26.78	91	85	0.93
CM50	C. andromeda	50	34.83	26.37	130	258	0.85
CM51	C. andromeda	30	17.96	13.47	63.33	146	0.48
CM58	C. andromeda	24	40.08	21.24	105	96	0.92
CM60	C. andromeda	22	45.24	26.18	105	96	0.96
CM61	P. punctata	5	47.51	19.02	68	39	0.91
CM62	P. punctata	5	30.18	17.61	49.88	39	0.84
CM63	P. punctata	6	53.43	37	105	39	0.93
CM64	P. punctata	5	40.23	11.67	60	33	0.83
CM65	Aurelia sp.	1	16.33	NA	16.33	66	0.58
	C. andromeda	8	9.55	11.37	33.71		0.96
	R. nomadica	2	2.75	2.47	4.5		0.75
CM66	C. andromeda	6	10.95	12.59	32.43	72	0.91
	R. nomadica	4	1.48	1.4	3.33		0.47
CM67	C. andromeda	7	5.34	7.38	21.43	68	0.66
CM68	Aurelia sp.	1	0.33	NA	0.33	63	0.14
	C. andromeda	8	9.72	11.21	34.29		0.85
CM69	C. andromeda	5	11.28	12.35	25	66	0.84
CM70	Aurelia sp.	1	3.67	NA	3.67	94	0.25
	C. andromeda	10	8	10.1	35.29		0.96
	R. nomadica	9	2.98	1.21	4.67		0.72
CM71	Aurelia sp.	1	11.5	NA	11.5	66	1
	C. andromeda	10	6.97	7.46	26		0.6
CM72	Aurelia sp.	1	8.67	NA	8.67	63	0.33
	C. andromeda	9	9.71	13.36	37.14		0.86
CM74	C. andromeda	9	10.9	9.16	29.57	63	0.86
	R. nomadica	1	0.75	NA	0.75		0.3
CM76	R. nomadica	14	2.5	2.01	6.67	53	0.78
CM77	R. nomadica	15	4.3	3.91	14.67	59	0.89
CM81	R. nomadica	6	4.03	4.87	10.5	25	0.68
CM82	R. nomadica	4	2.48	2.72	6.5	15	0.66
CM83	R. nomadica	5	1.27	1.78	4.33	21	0.67
CM84	R. nomadica	5	1.73	1.72	4.67	21	0.94
CM102	C. andromeda	11	10.8	10.84	31	38	0.31
	R. nomadica	4	3.94	1.16	5.25		0.93
CM103	C. andromeda	11	6.22	4.31	15	38	0.32
	R. nomadica	4	2.38	0.55	3		0.51
CM105	C. andromeda	11	1.81	3.79	13	24	0.03
CM106	C. andromeda	11	9.38	12.34	37	24	0.16
CM107	Aurelia sp.	11	6.5	6.8	19	38	0.11
	R. nomadica	4	3.27	1.35	5.25		0.81
CM109	Aurelia sp.	11	10.14	9.84	23	24	0.15
CM110	Aurelia sp.	5	9.6	4.84	15.5	24	0.47
CM111	Aurelia sp.	11	5.41	6.89	17.5	24	0.11
CM113	R. nomadica	4	3.4	0.57	4	14	0.77
CM114	R. nomadica	4	3.83	1.47	5.5	14	0.86

## Sheet: Index
Supp. Table S1: Cerata samples taken from C. militaris nudibranchs during the 12-day experiment to identify nematocysts in the cerata. Cerata from naturally feeding (Nat) nudibranchs were sampled, then nudibranchs were treated with 5% KCl, and fed Scyphozoa and Hydrozoa polyps (Cas: C. andromeda, Au: Aurelia sp., Nom: R. nomadica, Ap: A. pluma, Pd: P. Disticha). Nudibranch individuals were CM102 …
Supp. Table S2: Prey species and predation rate (polyps d-1) of C. militaris nudibranchs during the 12 d feeding experiment (Methods, section 2.6.3). C. militaris individuals are identified as CM with a number. Predation rates presented as mean ± SD (n = 12).
Supp. Table S3: Summary of the long-term experiment to examine the predatory capacity of C. militaris nudibranchs on four species of scyphozoan polyps (Aurelia sp., C. andromeda, P. punctata, and R. nomadica). Polyps were provided as prey at four doses, from low to very high (≤20, ≤50, ≤80, and >80 polyps d-1, respectively) and replenished twice weekly. Individual C. militaris nudibranchs are ide…
Supp. Table S4: Summary of the long-term feeding experiment to examine: a) the predatory capacity of C. militaris nudibranchs on four species of scyphozoan polyps (Aurelia sp., C. andromeda, P. punctata and R. nomadica) and b) nudibranch survival on these diets. Individual C. militaris nudibranchs are identified as “CM” with a number. Number of feeding events is the number of times the indicated …
