# Supplementary material for: Predation on scyphozoan polyps and selective nematocyst incorporation dynamics in an alien aeolid nudibranch
Source: Research Square preprint supplement (doi:10.21203/rs.3.rs-6803093/v1), 2025-06-18
Supplement: Supplementary file 2 [file cbcafb156f1249573fd19647.docx]

**Supplementary material**

**Predation on scyphozoan polyps and selective nematocyst incorporation dynamics in an alien aeolid nudibranch**

Hila Dror1, Tamar Lotan2, Dror L. Angel1*

1The Leon Recanati Institute for Maritime Studies, University of Haifa, Mt. Carmel, Haifa 3103301, Israel

2 Marine Biology Department, The Leon H. Charney School of Marine Sciences, University of Haifa, Mt. Carmel, Haifa 3103301, Israel

*Corresponding author e-mail: [dangel@univ.haifa.ac.il](mailto:dangel@univ.haifa.ac.il)


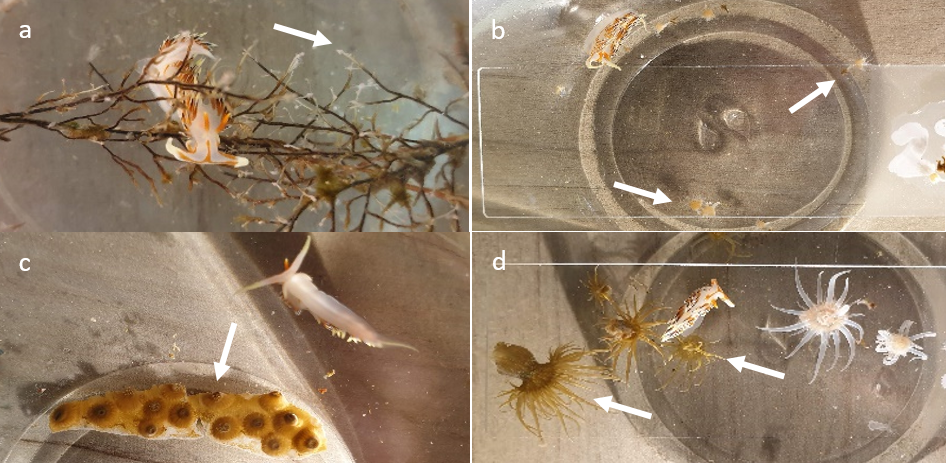


**Supp. Fig. S1**: Experimental glass bowls with various prey species (white arrows) and *C. militaris* nudibranchs. (a) *P. disticha,* (b) *C. andromeda,* (c) *O. patagonica,* (d) *E. diaphana*.


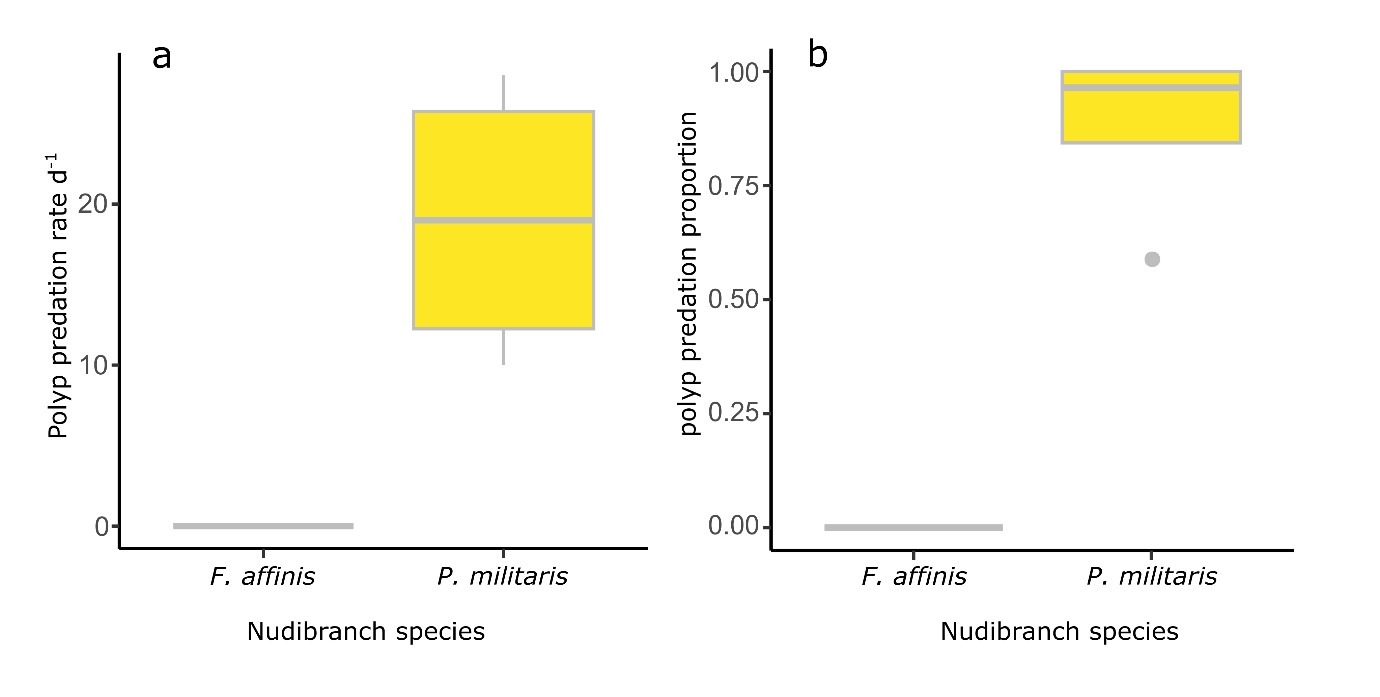


**Supp. Fig. S2**: *R. nomadica* polyps consumed by *F. affinis* (n = 4) and *C. militaris* (n = 4) nudibranchs during the 24 h feeding experiment. (a) predation rate presented as polyps day-1 (b) predation proportion (number polyps consumed / number polyps provided).


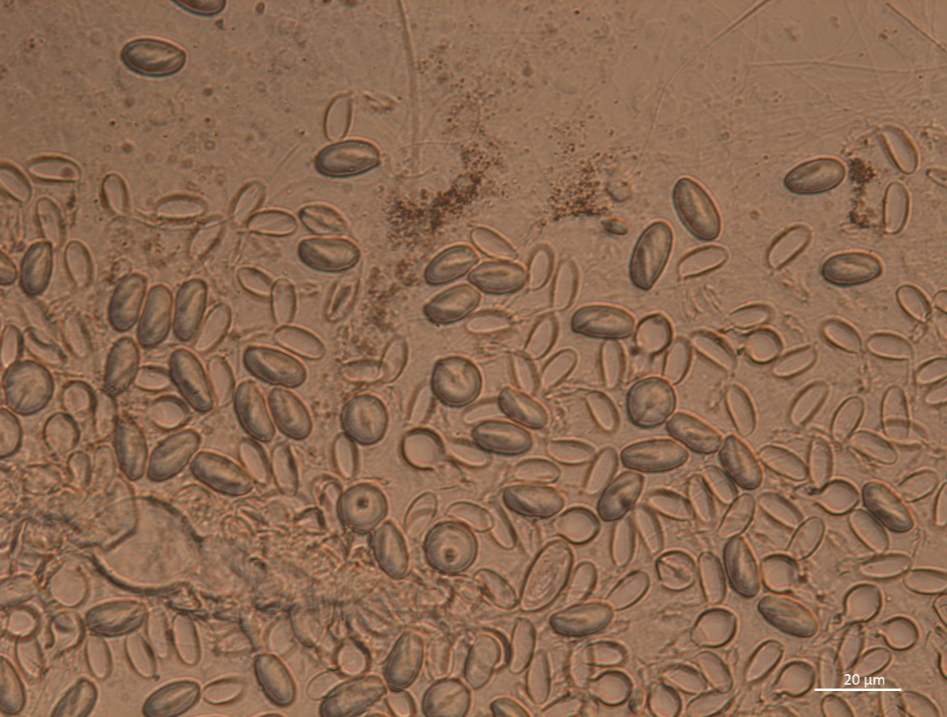


**Supp. Fig S3**: Nematocysts ejected from a squash preparation of a ceras of a naturally feeding *C. militaris* nudibranch showing many discharged and undischarged microbasic euryteles.

**Supp. Table S1**: Cerata samples taken from *C. militaris* nudibranchs during the 12-day experiment to identify nematocysts in the cerata. Cerata from naturally feeding (Nat) nudibranchs were sampled, then nudibranchs were treated with 5% KCl, and fed Scyphozoa and Hydrozoa polyps (Cas: *C. andromeda*, Au: *Aurelia* sp., Nom: *R. nomadica*, Ap: *A. pluma*, Pd: *P. Disticha*). Nudibranch individuals were CM102 to CM114. Each sample consisted of between 2 and 4 cerata (+ indicates cerata samples) excised from each nudibranch.

**Supp. Table S2**: Prey species and predation rate (polyps d-1) of *C. militaris* nudibranchs during the 12 d feeding experiment (Methods, section 2.6.3). *C. militaris* individuals are identified as CM with a number. Predation rates presented as mean ± SD (n = 12).

**Supp. Table S3**: Summary of the long-term experiment to examine the predatory capacity of *C. militaris* nudibranchs on four species of scyphozoan polyps (*Aurelia* sp*., C. andromeda, P. punctata*, and *R. nomadica*). Polyps were provided as prey at four doses, from low to very high (≤20, ≤50, ≤80, and >80 polyps d-1, respectively) and replenished twice weekly. Individual *C. militaris* nudibranchs are identified as “CM” with a number. *One replicate sample.

**Supp. Table S4**: Summary of the long-term feeding experiment to examine: a) the predatory capacity of *C. militaris* nudibranchs on four species of scyphozoan polyps (*Aurelia* sp*., C. andromeda, P. punctata* and *R. nomadica*) and b) nudibranch survival on these diets. Individual *C. militaris* nudibranchs are identified as “CM” with a number. Number of feeding events is the number of times the indicated prey species was provided. Scyphozoan polyps were replenished twice weekly.

15 mm

15 mm

15 mm

15 mm

**[Supp. Video S1](../videos/Supp%20video%20S1%20nomadica.mp4)**: Video capture of *C. militaris* feeding on polyps of *R. nomadica.*

[**Supp. Video S2**](../videos/Supp%20video%20S2%20cassiopea.mp4): Video capture of *C. militaris* feeding on polyps of *C. andromeda.*

[**Supp. Video S3**](../videos/Supp%20video%20S3%20aurelia.mp4): Video capture of *C. militaris* feeding on polyps of *Aurelia* sp.
